# Supplementary material
Source: PubMed Central journal article supplement (PMC3565429)
Supplement: NIHMS379022-supplement-supplement_1.pdf [file NIHMS379022-supplement-supplement_1.pdf]

## Supplementary Methods

### Genotyping

Genotyping of 4 nonsynonymous SNPs in *KLB* and *FGFR4* with minor allele frequencies (MAF) >9% (Supplementary Table 1) were performed as in previous studies and summarized in the appendix. These coding SNPs lead to changes in the amino acid sequence of their corresponding protein and, therefore, to potential changes in protein function.

Genomic DNA was isolated from whole blood using standard methods shortly after blood draw and stored at  $-80^{\circ}\text{C}$  until genotyping. Genotyping was performed using TaqMan SNP Genotyping Assays (Applied Biosystems, Foster City, CA) per manufacturer's instructions. Following PCR amplification, end reactions were analyzed using ABI 7300FAST Real-Time PCR System by Sequence Detection Software (Applied Biosystems, Foster City, CA).

**Supplementary Table 1.** Candidate SNPs in *KLB* and *FGFR4* With *P* values for Hardy–Weinberg Equilibrium and MAF

| Gene         | SNP rs ID  | Major allele | Minor allele | Predicted MAF | HV in full cohort<br>n = 282 |                    | HV in transit cohort<br>n = 56 |                    | Function | Amino acid position | Amino acid change |
|--------------|------------|--------------|--------------|---------------|------------------------------|--------------------|--------------------------------|--------------------|----------|---------------------|-------------------|
|              |            |              |              |               | Observed MAF                 | HWE <i>P</i> value | Observed MAF                   | HWE <i>P</i> value |          |                     |                   |
| <i>KLB</i>   | Rs17618244 | G            | A            | 0.155         | 0.181                        | .109               | 0.164                          | .325               | Missense | 728                 | Arg → Gln         |
| <i>FGFR4</i> | Rs1966265  | G            | A            | 0.224         | 0.226                        | .309               | 0.200                          | .670               | Missense | 10                  | Val → Ile         |
| <i>FGFR4</i> | Rs376618   | T            | C            | 0.225         | 0.204                        | .001*              | 0.273                          | .047*              | Missense | 136                 | Leu → Pro         |
| <i>FGFR4</i> | Rs351855   | G            | A            | 0.283         | 0.333                        | .079               | 0.318                          | .210               | Missense | 388                 | Gly → Arg         |

HWE, Hardy–Weinberg Equilibrium.

NOTE. Predicted MAF is based on the HapMap-CEU population. Observed MAF is derived from genotypes of the healthy volunteers in the full study cohort of 714 subjects (n = 282) and the HV subset (n = 56) of the 238 subjects with transit measurements. HWE *P* value >.05 denotes that the study sample is in HWE for the corresponding SNP; the two *P* values not satisfying HWE are marked with an asterisk.

This table is reproduced from a more extensive table in Wong BS, et al. *Gastroenterology* 2011;140:1934–1942.<sup>15</sup>

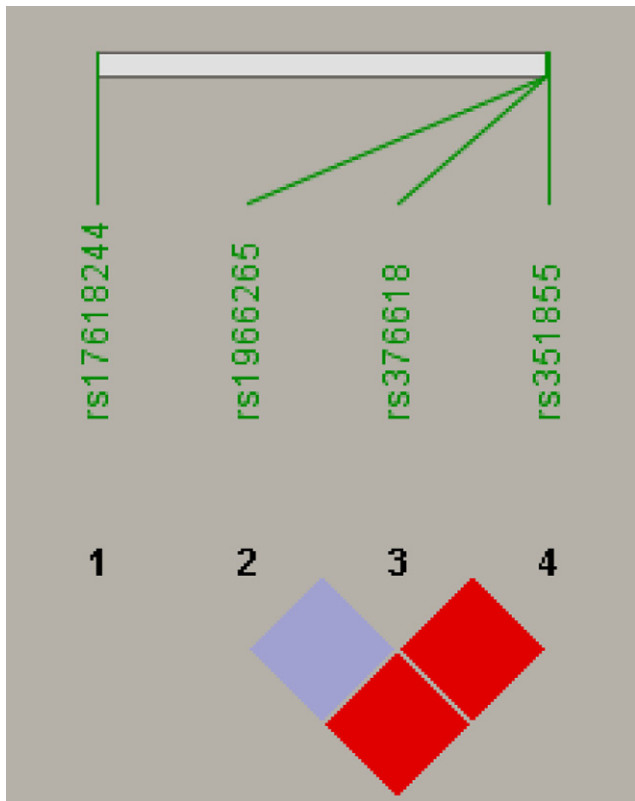

**Supplementary Figure 1.** The 3 SNPS in FGFR4 were not in linkage disequilibrium.

**Supplementary Table 2.** Sample Size Assessment

| Response                                         | Observed overall mean | Observed (pooled) SD | Observed overall mean (log scale) | Observed (pooled) SD (log scale) | Effect sizes detectable with ~80% power at $\alpha = .05$ (2-sided) n = 23/group |                              |
|--------------------------------------------------|-----------------------|----------------------|-----------------------------------|----------------------------------|----------------------------------------------------------------------------------|------------------------------|
|                                                  |                       |                      |                                   |                                  | Log scale <sup>a</sup>                                                           | Geometric means <sup>b</sup> |
| Serum C4, ng/ml                                  | 28                    | 27                   | 2.909                             | 0.984                            | 25%                                                                              | 79%                          |
| Serum FGF19, pg/ml                               | 130                   | 95                   | 4.681                             | 0.589                            | 10%                                                                              | 49%                          |
| 48-h Stool bile acid, $\mu\text{mol}/24\text{h}$ | 682                   | 801                  | 6.054                             | 0.989                            | 13%                                                                              | 79%                          |
| 48-h Stool fat, g/24h                            | 5.3                   | 5.5                  | 1.443                             | 0.716                            | 35%                                                                              | 59%                          |
| 48-h Stool weight, g/24h                         | 132                   | 104                  | 5.284                             | 0.824                            | 12%                                                                              | 67%                          |

NOTE. This table shows that the distributions for many of the responses were positively skewed; therefore, an assessment of the associations that could have been detected was based on first transforming to log scale. The associations corresponding to the differences (in log scale) are the *minimal* ones that could have been detected (with 80% power), and thus, for example, a clinically meaningful association corresponding to differences of 20% or 25% for stool weight could have been detected with somewhat greater power. The sample size of ~23 per group was expected to provide approximately 80% power (based on a 2-sample *t* test using a 2-sided  $\alpha$  level of .05) to detect the effect sizes shown in Supplementary Table 2 for the end points of interest, ie, associations with group status corresponding to differences between pairs of groups for the end points of interest, eg, 12% (Log[stool weight]), 25% (Log[serum C4]), and 10% (Log[FGF19]).

<sup>a</sup>The effect size is 100\* (the difference [in log scale]/the overall mean [in log scale]).

<sup>b</sup>The effect size is 100\* (difference in geometric Means/mean of the geometric means).

**Supplementary Table 3.** Primary Measurements in 3 Subgroups

| Data show median (IQR)                                        | IBS-D                | IBS-C               | Healthy controls    |
|---------------------------------------------------------------|----------------------|---------------------|---------------------|
| Serum C4, ng/ml <sup>a</sup>                                  | 32.7 (18.9–68.6)     | 20.8 (5.7–30.6)     | 16.9 (6.1–28.0)     |
| 48-h Stool bile acid, $\mu\text{mol}/24\text{h}$ <sup>b</sup> | 863.5 (452.7–1213.1) | 229.4 (141.5–596.7) | 363.4 (193.7–762.1) |
| 48-h Stool fat, g/24h                                         | 4.0 (3.0–8.0)        | 4.0 (2.0–4.0)       | 4.0 (2.0–7.0)       |

NOTE. Overall associations with subgroup: <sup>a</sup>*P* = .02; <sup>b</sup>*P* = .057.
